# Supplementary material
Source: PubMed Central journal article supplement (PMC6120353)
Supplement: noy108_suppl_supplementary_material.pdf [file noy108_suppl_supplementary_material.pdf]

**SUPPLEMENTARY MATERIAL**

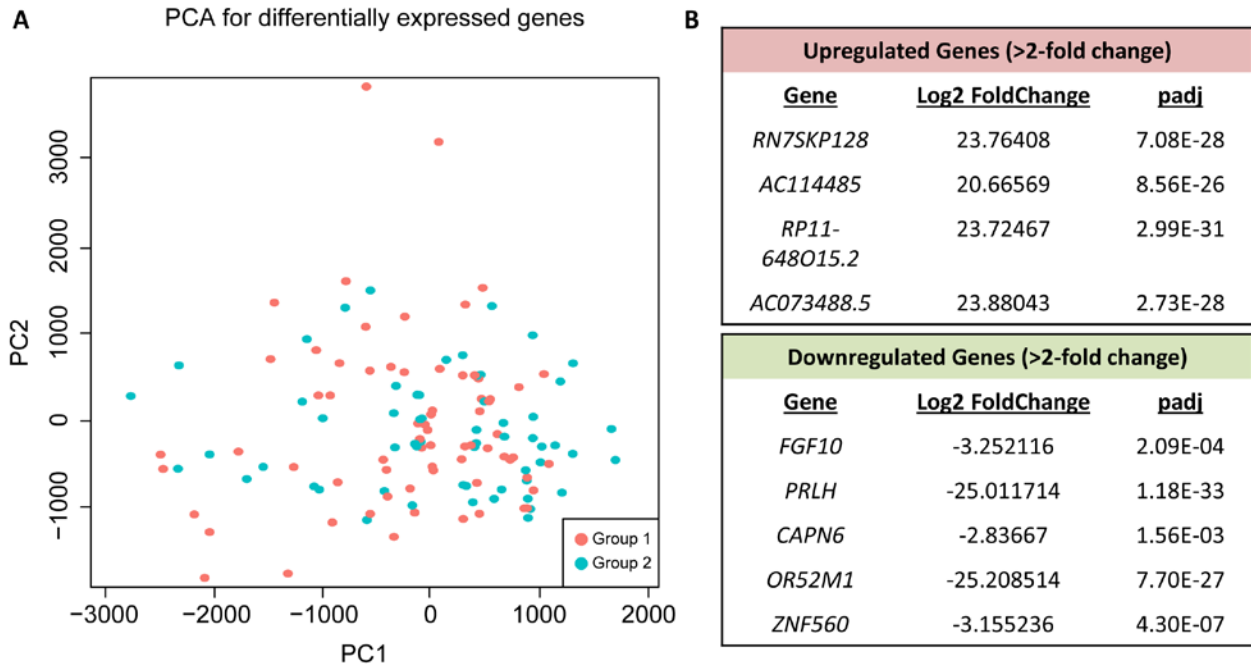

**Supplementary Figure 1. Differentially expressed genes do not predict poor survival group of paired initial/recurrent glioblastoma.** A) Principle component analysis of significantly differentially expressed genes of TCGA dataset comparing regions of relatively poor (Group 1) and better (Group 2) survival. B) Only nine differentially expressed genes identified in group 1 relative to group 2 (>2-fold change; adjusted p-value<0.05).

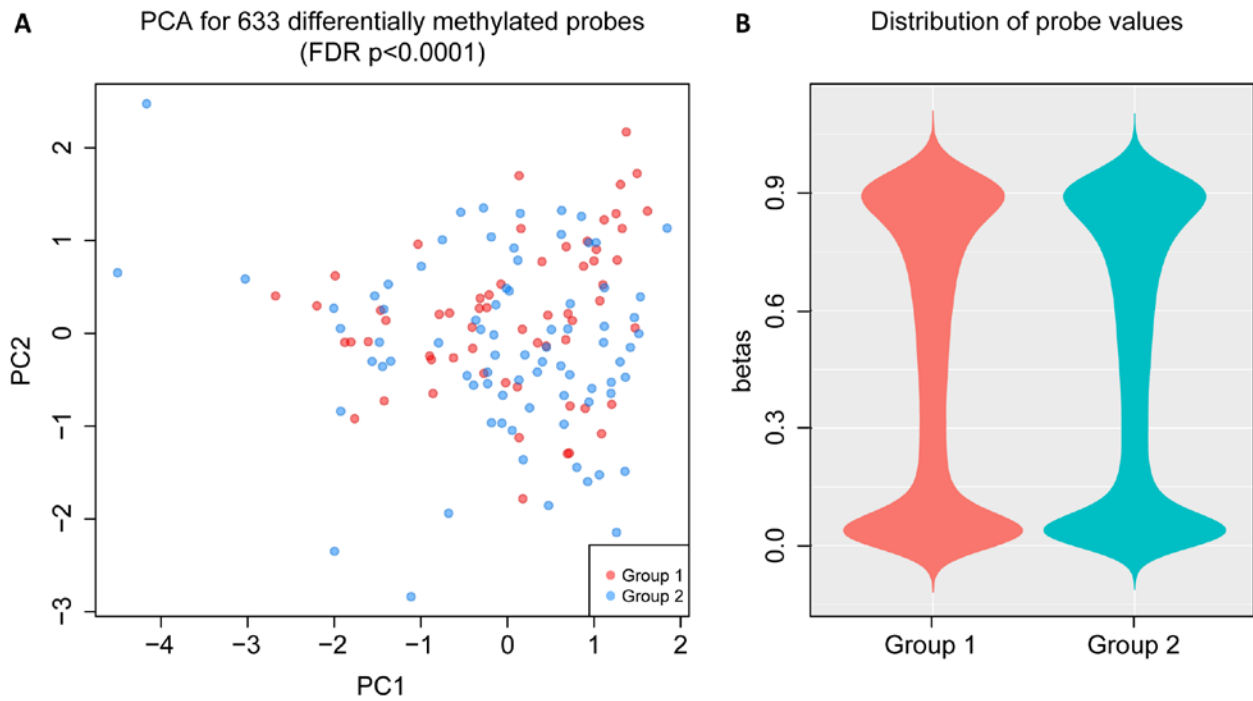

**Supplementary Figure 2. Differentially methylated probes are not of diagnostic utility to predict poor survival group of paired initial/recurrent glioblastoma.** A) Principle component analysis of highest ranked differentially methylated genes of TCGA dataset comparing regions of relatively poor (Group 1) and better (Group 2) survival. B) Violin plots showing overlapping distribution of probe values for Group 1 versus Group 2.

| Pathway                                         | B-H adj. p-value | Genes                                                                                                                         | Pathway ID            |
|-------------------------------------------------|------------------|-------------------------------------------------------------------------------------------------------------------------------|-----------------------|
| Cell Cycle                                      | 0.006628077      | ATM, CCNA1, CCND2, CDK6, CDKN1C, FKBPL, HIST1H3I, HIST1H4L, HSPA2, MDC1, NUP98, PSMB8, PSMB9, RAB1B, TUBB                     | R-HSA-1640170         |
| p53 signaling pathway                           | 0.006628077      | APAF1, ATM, CCND2, CDK6, IGFBP3, PTEN                                                                                         | hsa04115              |
| Antigen processing and presentation             | 0.006628077      | HSPA1A, HSPA1L, HSPA2, TAP1, TAP2, TAPBP                                                                                      | hsa04612              |
| Legionellosis                                   | 0.013984079      | APAF1, HSPA1A, HSPA1L, HSPA2, RAB1B                                                                                           | hsa05134              |
| Cellular responses to stress                    | 0.022219649      | ATM, CCNA1, CDK6, HIST1H3I, HIST1H4L, HSPA1A, HSPA1L, HSPA2, NUP98, PSMB8, PSMB9                                              | R-HSA-2262752         |
| Regulation of HSF1-mediated heat shock response | 0.02632611       | ATM, HSPA1A, HSPA1L, HSPA2, NUP98                                                                                             | R-HSA-3371453         |
| Attenuation phase                               | 0.02632611       | HSPA1A, HSPA1L, HSPA2                                                                                                         | R-HSA-3371568         |
| Cell Cycle, Mitotic                             | 0.02632611       | CCNA1, CCND2, CDK6, CDKN1C, FKBPL, HIST1H3I, HIST1H4L, NUP98, PSMB8, PSMB9, RAB1B, TUBB                                       | R-HSA-69278           |
| Transcriptional regulation by RUNX1             | 0.031795388      | CCND2, CDK6, ESR1, GATA3, HIST1H3I, HIST1H4L, PSMB8, PSMB9                                                                    | R-HSA-8878171         |
| ER-Phagosome pathway                            | 0.038987293      | PSMB8, PSMB9, TAP1, TAP2, TAPBP                                                                                               | R-HSA-1236974         |
| Generic Transcription Pathway                   | 0.038987293      | APAF1, ATM, BRD2, CCNA1, CCND2, CDK6, ESR1, GATA3, HIST1H3I, HIST1H4L, IGFBP3, MDC1, NOTCH4, PSMB8, PSMB9, PTEN, THRB, ZNF311 | R-HSA-212436          |
| Cellular response to heat stress                | 0.040462015      | ATM, HSPA1A, HSPA1L, HSPA2, NUP98                                                                                             | R-HSA-3371556         |
| Cellular responses to external stimuli          | 0.040462015      | ATM, CCNA1, CDK6, HIST1H3I, HIST1H4L, HSPA1A, HSPA1L, HSPA2, NUP98, PSMB8, PSMB9                                              | R-HSA-8953897         |
| Direct p53 effectors                            | 0.040462015      | APAF1, BCL2, CAV1, IGFBP3, PTEN, TAP1                                                                                         | p53downstream pathway |
| Hepatitis B                                     | 0.044881948      | APAF1, ATF6B, BCL2, CCNA1, CDK6, PTEN                                                                                         | hsa05161              |
| Mitotic G1-G1/S phases                          | 0.047027426      | CCNA1, CCND2, CDK6, CDKN1C, PSMB8, PSMB9                                                                                      | R-HSA-453279          |

**Supplementary Table 1. Significantly impacted biologic pathways as determined by differentially methylated genes comparing regions of poor versus better survival groups.**
